# Supplementary material for: Toward the Synthesis and Improved Biopotential of an N-methylated Analog of a Proline-Rich Cyclic Tetrapeptide from Marine Bacteria
Source: MDPI journal article supplement (doi:10.3390/md16090305), 2018-08-30
Supplement: s1 [file s1]

## Supporting Information

### Toward the Synthesis and Improved Biopotential of an *N*-methylated Analog of a Proline-Rich Cyclic Tetrapeptide from Marine Bacteria

Rajiv Dahiya<sup>1\*</sup>, Suresh Kumar<sup>2\*</sup>, Sukhbir Lal Khokra<sup>2</sup>, Sheeba Varghese Gupta<sup>3</sup>, Vijaykumar B. Sutariya<sup>3</sup>, Deepak Bhatia<sup>4</sup>, Ajay Sharma<sup>5</sup>, Shamjeet Singh<sup>1</sup> and Sandeep Maharaj<sup>1</sup>

<sup>1</sup>Laboratory of Peptide Research and Development, School of Pharmacy, Faculty of Medical Sciences, The University of the West Indies, St. Augustine, Trinidad & Tobago, West Indies; Rajiv.Dahiya@sta.uwi.edu; Shamjeet.Singh@sta.uwi.edu; Sandeep.Maharaj@sta.uwi.edu

<sup>2</sup>Institute of Pharmaceutical Sciences, Kurukshetra University, Kurukshetra 136119, Haryana, India; sureshmpharma@rediffmail.com; slkhokra@kuk.ac.in

<sup>3</sup>Department of Pharmaceutical Sciences, USF College of Pharmacy, University of South Florida, Tampa, FL 33612-4749, USA; svarghes@health.usf.edu; vsutariy@health.usf.edu

<sup>4</sup>Department of Pharmacogenomics, Bernard J. Dunn School of Pharmacy, Shenandoah University- ICPH Fairfax, Fairfax, VA 22031, USA; dbhatia@su.edu

<sup>5</sup>Department of Pharmacognosy, Amity Institute of Pharmacy, Amity University, Gwalior 474020, Madhya Pradesh, India; asharma5@gwa.amity.edu

| Content                                                                                   | Page |
|-------------------------------------------------------------------------------------------|------|
| Figure S1.                                                                                |      |
| <sup>1</sup> H NMR spectrum for proline-rich <i>N</i> -methylated tetracyclopeptide.....  | 2    |
| Figure S2.                                                                                |      |
| <sup>13</sup> C NMR spectrum for proline-rich <i>N</i> -methylated tetracyclopeptide..... | 3    |
| Figure S3.                                                                                |      |
| Mass spectrum for proline-rich <i>N</i> -methylated tetracyclopeptide.....                | 4    |
| Table S1.                                                                                 |      |
| Various steric and lipophilicity parameters for linear and tetracyclopeptide.....         | 5    |

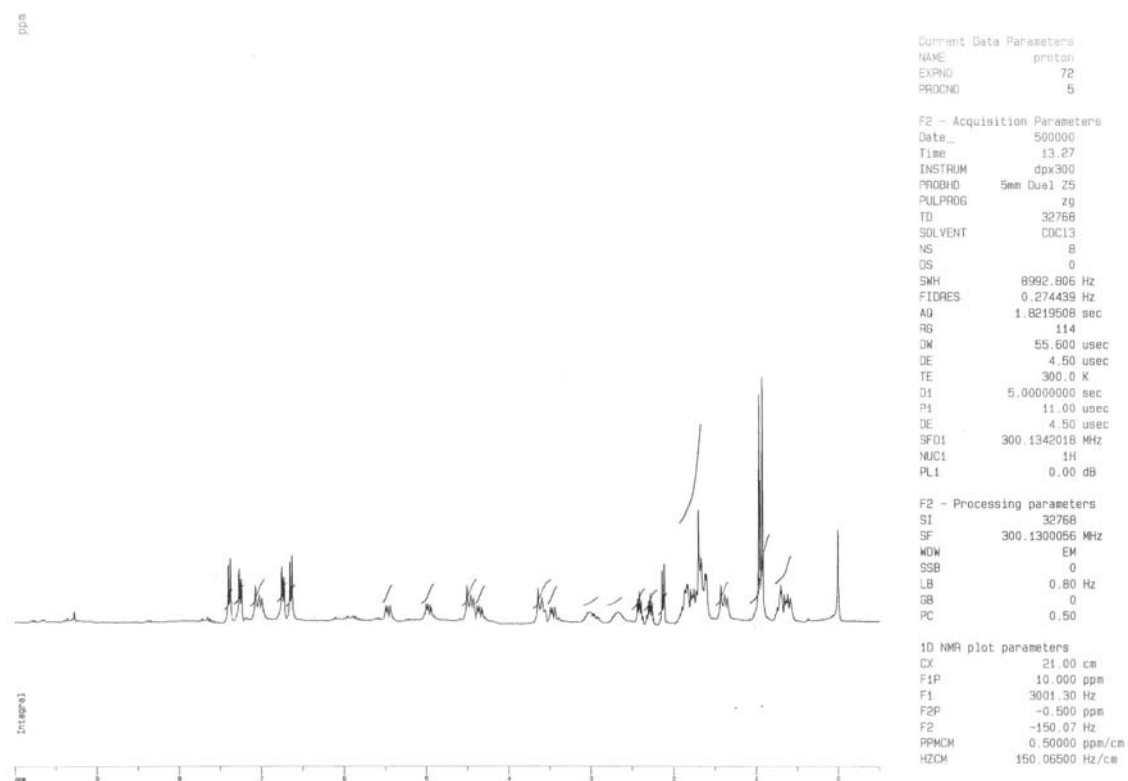

**Figure S1.**  $^1\text{H}$  NMR spectrum for proline-rich N-methylated tetracyclopeptide **4**

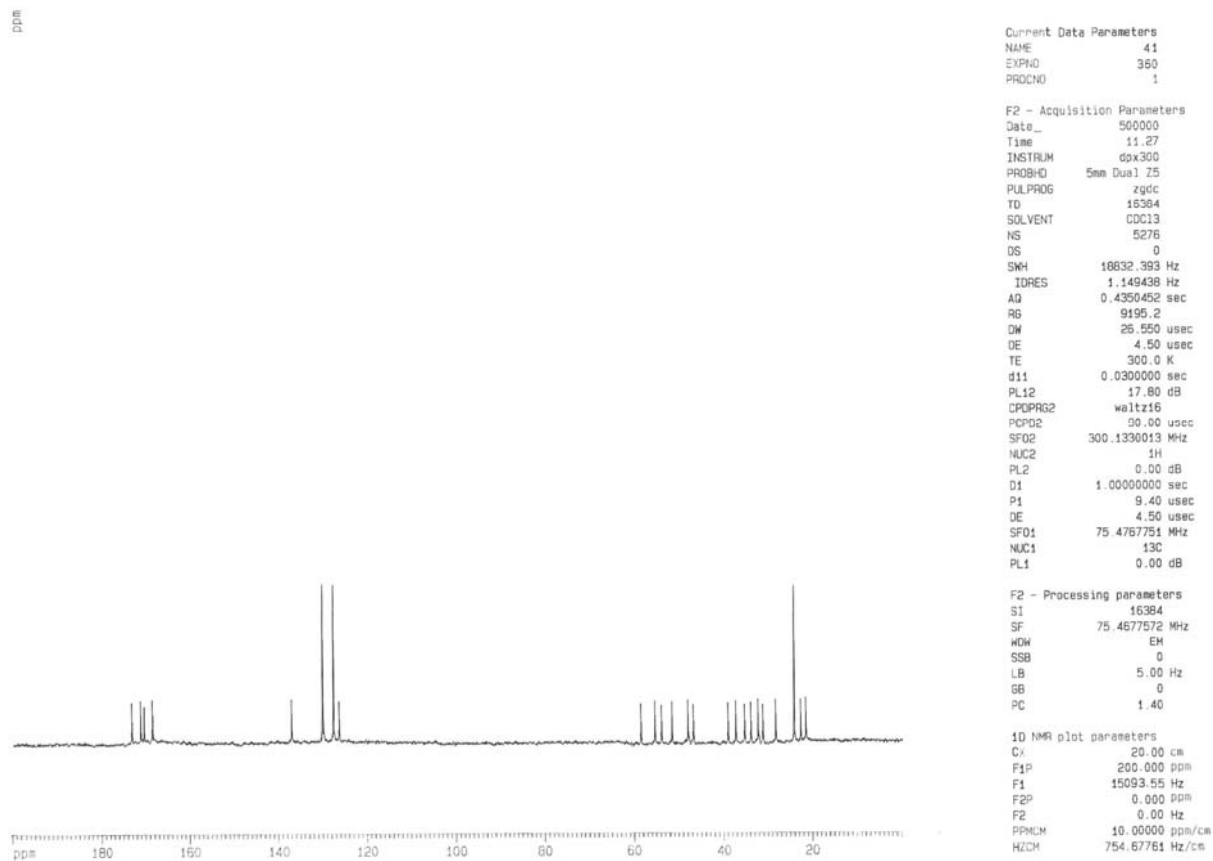

**Figure S2.**  $^{13}\text{C}$  NMR spectrum for proline-rich N-methylated tetracyclopeptide **4**

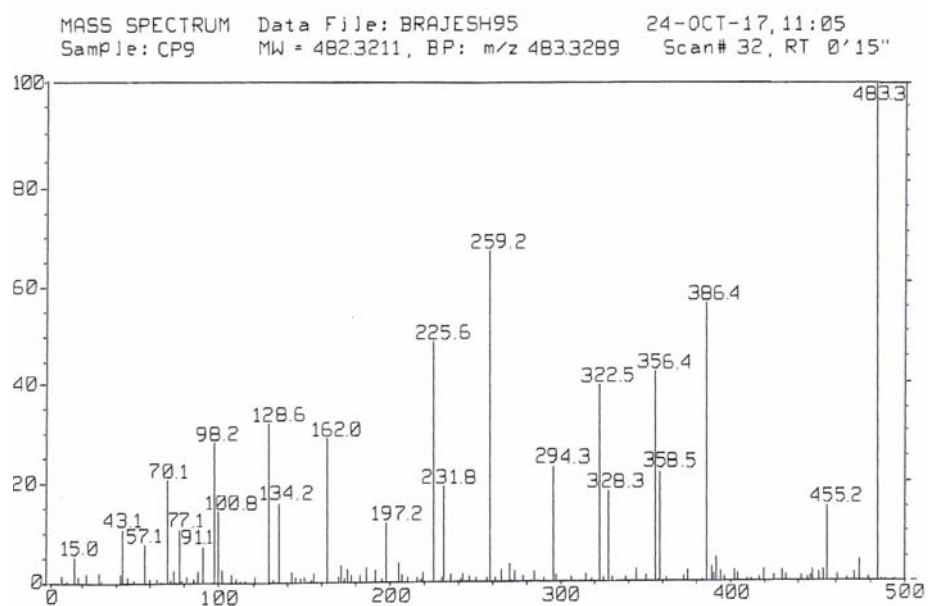

**Figure S3.** Mass spectrum for proline-rich *N*-methylated tetracyclopeptide **4**

**Table S1.** Various steric and lipophilicity parameters for linear and cyclotetrapeptide (3, 4)

| Parameter                              | *Calculated value for                         |                                               |
|----------------------------------------|-----------------------------------------------|-----------------------------------------------|
|                                        | Compound 3                                    | Compound 4                                    |
| Molar Refractivity (MR <sup>20</sup> ) | 165.05 ± 0.3 cm <sup>3</sup>                  | 133.74 ± 0.4 cm <sup>3</sup>                  |
| Molar Volume (MV <sup>20</sup> )       | 523.8 ± 3.0 cm <sup>3</sup>                   | 391.9 ± 5.0 cm <sup>3</sup>                   |
| Parachor (P <sub>r</sub> )             | 1384.4 ± 6.0 cm <sup>3</sup>                  | 1072.4 ± 6.0 cm <sup>3</sup>                  |
| Refractive Index (n <sup>20</sup> )    | 1.542 ± 0.02                                  | 1.598 ± 0.03                                  |
| Surface Tension (γ <sup>20</sup> )     | 48.7 ± 3.0 dyne/cm                            | 56.0 ± 5.0 dyne/cm                            |
| Density (d <sup>20</sup> )             | 1.173 ± 0.06 g cm <sup>-3</sup>               | 1.23 ± 0.1 g cm <sup>-3</sup>                 |
| Polarizability (α)                     | 65.43 ± 0.5 10 <sup>-24</sup> cm <sup>3</sup> | 53.02 ± 0.5 10 <sup>-24</sup> cm <sup>3</sup> |
| log P (n-Octanol/water)                | 4.19 ± 0.78                                   | 3.86 ± 0.89                                   |

\*Values were calculated using ACD/ChemSketch 2.0 software
